# Supplementary material for: Prevalence of polymyxin resistant bacterial strains in India: a systematic review and meta-analysis
Source: bioRxiv or medRxiv preprint supplement (doi:10.1101/2023.10.04.23296553), 2024-04-22
Supplement: Supplementary file [file media-1.pdf]

## Supplementary Information

### **Incidence and prevalence of polymyxin resistant bacterial strains in the clinical and environmental samples in India: a systematic review and meta-analysis**

**Sambit K. Dwibedy<sup>1,3</sup>, Indira Padhy<sup>1</sup>, Aditya K. Panda<sup>1,2</sup>, Saswat S. Mohapatra<sup>1,2\*</sup>**

<sup>1</sup>Department of Biotechnology, Berhampur University, Bhanja Bihar, Berhampur- 760007, Odisha, India

<sup>2</sup>Centre of Excellence on Bioprospecting of Ethno-pharmaceuticals of Southern Odisha (CoE-BESO), Berhampur University, Bhanja Bihar, Berhampur- 760007, India

<sup>3</sup>Department of Zoology, SBRG Women's College, Berhampur- 760001, Odisha, India

For Correspondence- [saswatsmohapatra@gmail.com](mailto:saswatsmohapatra@gmail.com)

**Supplementary Table 1.** Reports on polymyxin resistance (Pol<sup>R</sup>) in India.

| Sl. No. | Author                                   | Sample Size | Pol <sup>R</sup> Isolates | State / UT            | Resistance Detection Method     | <i>mcr</i> Screening |
|---------|------------------------------------------|-------------|---------------------------|-----------------------|---------------------------------|----------------------|
| 1       | #Banerjee et al., 2024 <sup>1</sup>      | 100         | 9                         | Uttar Pradesh         | BMD                             | NO                   |
| 2       | Soni et al., 2023 <sup>2</sup>           | 736         | 33                        | Madhya Pradesh        | BMD                             | <i>mcr</i> 1-3       |
| 3       | Kaza et al., 2023 <sup>3</sup>           | 108         | 18                        | Chandigarh            | BMD                             | YES                  |
| 4       | Vasesi et al., 2023 <sup>4</sup>         | 103         | 7                         | Chandigarh            | BMD                             | NO                   |
| 5       | Sharma et al., 2023 <sup>5</sup>         | 356         | 45                        | Uttar Pradesh         | KB DDT, BMD, ADM                | NO                   |
| 6       | Ranjan et al., 2023 <sup>6</sup>         | 100         | 9                         | Andhra Pradesh        | Gradient diffusion, BMD, E-test | NO                   |
| 7       | Shanthini et al., 2023 <sup>7</sup>      | 30          | 27                        | Tamil Nadu            | BMD                             | <i>mcr</i> 1-5       |
| 8       | Rout et al., 2023 <sup>8</sup>           | 6013        | 778                       | Odisha                | VITEK-2, BMD, CBDE              | <i>mcr</i> 1-5       |
| 9       | Sharma et al., 2022 <sup>9</sup>         | 45          | 31                        | Uttar Pradesh         | KB DDT, BMD                     | NO                   |
| 10      | Elizabeth et al., 2022 <sup>10</sup>     | 291         | 12                        | Assam                 | BMD, RPNP                       | YES                  |
| 11      | Bir et al., 2022 <sup>11</sup>           | 110         | 25                        | Delhi                 | BMD, VITEK-2, RPNP, E-test      | <i>mcr</i> 1-5       |
| 12      | Panigrahi et al., 2022 <sup>12</sup>     | 357         | 70                        | Odisha                | VITEK-2, BMD                    | NO                   |
| 13      | Sharma et al., 2022 <sup>13</sup>        | 125         | 25                        | Uttar Pradesh         | BMD, CBDE                       | <i>mcr</i> 1-5       |
| 14      | Reddy et al., 2022 <sup>14</sup>         | 1852        | 31                        | Telangana             | VITEK-2, BMD                    | <i>mcr</i> -1        |
| 15      | Das et al., 2022 <sup>15</sup>           | 158         | 27                        | Odisha, UP, Rajasthan | BMD, VITEK-2                    | <i>mcr</i> 1-5       |
| 16      | Nirwan et al., 2021 <sup>16</sup>        | 6765        | 18                        | Haryana               | BMD, VITEK-2                    | <i>mcr</i> -1        |
| 17      | Azam et al., 2021 <sup>17</sup>          | 335         | 11                        | Delhi                 | BMD, KB DDT                     | <i>mcr</i> 1-8       |
| 18      | Kar et al., 2021 <sup>18</sup>           | 200         | 27                        | Odisha                | BMD, ADM, E test, RPNP          | <i>mcr</i> -1 & 2    |
| 19      | Prasad et al., 2021 <sup>19</sup>        | 188         | 97                        | Delhi                 | KB DDT                          | NO                   |
| 20      | Sohail et al., 2021 <sup>20</sup>        | 106         | 19                        | Karnataka             | BMD, KB DDT                     | NO                   |
| 21      | Gunalan et al., 2021 <sup>21</sup>       | 75          | 11                        | Pondicherry           | BMD                             | NO                   |
| 22      | Priyanka et al., 2021 <sup>22</sup>      | 171         | 102                       | Rajasthan             | BMD                             | NO                   |
| 23      | Bandyopadhyay et al., 2021 <sup>23</sup> | 72          | 2                         | West Bengal           | KB DDT, BMD                     | YES                  |
| 24      | Sharma et al., 2021 <sup>24</sup>        | 365         | 9                         | Uttar Pradesh         | BMD, KB DDT                     | <i>mcr</i> 1-5       |
| 25      | Aarathi et al., 2020 <sup>25</sup>       | 440         | 11                        | Tamil Nadu            | BMD                             | YES                  |
| 26      | Raghupati et al., 2020 <sup>26</sup>     | 30          | 10                        | Tamil Nadu            | BMD, KB DDT                     | <i>mcr</i> 1-4       |
| 27      | Bardhan et al., 2020 <sup>27</sup>       | 84          | 57                        | West Bengal           | BMD, KB DDT                     | <i>mcr</i> -1        |

|    |                                             |      |     |                  |                                      |                          |
|----|---------------------------------------------|------|-----|------------------|--------------------------------------|--------------------------|
| 28 | Khurana et al., 2020 <sup>28</sup>          | 910  | 196 | Delhi            | VITEK-2, BMD                         | NO                       |
| 29 | Soundari et al., 2020 <sup>29</sup>         | 65   | 43  | Tamil Nadu       | BMD, KB DDT                          | <i>mcr-1</i>             |
| 30 | Mitra et al., 2020 <sup>30</sup>            | 60   | 24  | Odisha           | BMD                                  | <i>mcr-1 &amp; mcr-2</i> |
| 31 | Das et al., 2020 <sup>31</sup>              | 138  | 31  | West Bengal      | VITEK-2, BMD, E-test, Agar Diffusion | <i>mcr-1</i>             |
| 32 | Waattal et al., 2019 <sup>32</sup>          | 225  | 73  | Delhi            | Vitek-2, Micronaut-S, BMD E-test     | NO                       |
| 33 | Gogry et al., 2019 <sup>33</sup>            | 253  | 47  | Delhi            | BMD                                  | <i>mcr-1 &amp; mcr-3</i> |
| 34 | Mathur et al., 2019 <sup>34</sup>           | 846  | 34  | Delhi            | VITEK-2, BMD, KB-DDT                 | YES                      |
| 35 | Sundaramoorthy et al., 2019 A <sup>35</sup> | 9    | 4   | Tamil Nadu       | BMD                                  | NO                       |
| 36 | Sundaramoorthy et al., 2019 B <sup>36</sup> | 6    | 2   | Tamil Nadu       | BMD                                  | <i>mcr 1-9</i>           |
| 37 | Amladi et al., 2019 <sup>37</sup>           | 150  | 14  | Tamil Nadu       | BMD                                  | <i>mcr-1</i>             |
| 38 | Garg et al., 2019 <sup>38</sup>             | 146  | 27  | Uttar Pradesh    | BMD                                  | NO                       |
| 39 | Raghupati et al., 2019 <sup>39</sup>        | 87   | 27  | Tamil Nadu       | BMD, KB-DDT                          | NO                       |
| 40 | Kumar et al., 2018 <sup>40</sup>            | 932  | 17  | Kerala           | VITEK-2, BMD                         | <i>mcr-1 &amp; 2</i>     |
| 41 | Manohar et al., 2017 <sup>41</sup>          | 89   | 29  | Tamil Nadu       | KB DDT, BMD                          | <i>mcr-1 &amp; 2</i>     |
| 42 | Kumar., 2016 <sup>42</sup>                  | 31   | 30  | Odisha & Haryana | BMD                                  | NO                       |
| 43 | Kumar et al., 2016 C <sup>43</sup>          | 1590 | 123 | Odisha           | BMD, KB DDT                          | NO                       |

KB DDT-Kirby-Bauer Disc Diffusion Test, BMD-Broth Micro-dilution, E-test-Epsilometer Test, ADM- Agar Dilution Method, CBDE- Colistin Broth Disc Elution, RPNP- Rapid Polymyxin Nordmann Poirel Test. # The paper was published in 2023 as an online early version, hence included in the study.

**Supplementary Table 2.** Reports on the contribution of *mcr* gene in the development of polymyxin resistance in India.

| Sl. No. | Author                                    | State/ UT                        | No. of Pol <sup>R</sup> Isolates | No. of <i>mcr</i> positive isolates |
|---------|-------------------------------------------|----------------------------------|----------------------------------|-------------------------------------|
| 1       | #Seethalakshmi et al., 2024 <sup>44</sup> | Tamil Nadu                       | 1                                | 1                                   |
| 2       | Naha et al., 2023 <sup>45</sup>           | West Bengal                      | -                                | 10                                  |
| 3       | Premnath et al., 2023 <sup>46</sup>       | Tamil Nadu                       | -                                | 23                                  |
| 4       | Talat et al., 2023 <sup>47</sup>          | West Bengal                      | 1                                | 1                                   |
| 5       | Pathak et al., 2023 <sup>48</sup>         | Uttar Pradesh                    | 6                                | 0                                   |
| 6       | Aldeia et al., 2023 <sup>49</sup>         | Not mentioned                    | 1                                | 0                                   |
| 7       | Sreejith et al., 2023 <sup>50</sup>       | Kerala                           | 1                                | 1                                   |
| 8       | Shanthini et al., 2023 <sup>7</sup>       | Tamil Nadu                       | 27                               | 0                                   |
| 9       | Rout et al., 2023 <sup>8</sup>            | Odisha                           | 778                              | 0                                   |
| 10      | Talat et al., 2022 <sup>51</sup>          | West Bengal                      | 1                                | 1                                   |
| 11      | Elizabeth et al., 2022 <sup>10</sup>      | Assam                            | 12                               | 5                                   |
| 12      | Bir et al., 2022 <sup>11</sup>            | Delhi                            | 25                               | 1                                   |
| 13      | Naha et al., 2022 <sup>52</sup>           | West Bengal                      | 9                                | 0                                   |
| 14      | Sharma et al., 2022 <sup>13</sup>         | Uttar Pradesh                    | 25                               | 0                                   |
| 15      | Reddy et al., 2022 <sup>14</sup>          | Telangana                        | 31                               | 2                                   |
| 16      | Das et al., 2022 <sup>15</sup>            | Odisha, Uttar Pradesh, Rajasthan | 27                               | 0                                   |
| 17      | Azam et al., 2021 <sup>17</sup>           | Delhi                            | 11                               | 0                                   |
| 18      | Nirwan et al., 2021 <sup>16</sup>         | Haryana                          | 18                               | 0                                   |
| 19      | Singh et al., 2021 <sup>53</sup>          | Uttar Pradesh                    | 22                               | 19                                  |
| 20      | Elizabeth et al., 2021 <sup>54</sup>      | Assam                            | 6                                | 2                                   |
| 21      | Kar et al., 2021 <sup>18</sup>            | Odisha                           | 27                               | 0                                   |
| 22      | Karade et al., 2021 <sup>55</sup>         | Maharashtra                      | 1                                | 0                                   |
| 23      | Bandyopadhyay et al., 2021 <sup>23</sup>  | West Bengal                      | 2                                | 0                                   |
| 24      | Sharma et al., 2021 <sup>24</sup>         | Uttar Pradesh                    | 9                                | 0                                   |
| 25      | Aarathi et al., 2021 <sup>25</sup>        | Tamil Nadu                       | 11                               | 0                                   |
| 26      | Pathak et al., 2020 <sup>56</sup>         | Uttar Pradesh                    | 40                               | 4                                   |
| 27      | Raghupati et al., 2020 <sup>26</sup>      | Tamil Nadu                       | 10                               | 1                                   |
| 28      | Roy et al., 2020 <sup>57</sup>            | West Bengal                      | 3                                | 3                                   |

|    |                                                    |                |    |    |
|----|----------------------------------------------------|----------------|----|----|
| 29 | Dey et al., 2020 <sup>58</sup>                     | Odisha         | 1  | 0  |
| 30 | Bardhan et al., 2020 <sup>27</sup>                 | West Bengal    | 57 | 0  |
| 31 | Sahoo et al., 2020 <sup>59</sup>                   | Odisha         | 1  | 0  |
| 32 | Khamari et al., 2020 <sup>60</sup>                 | Andhra Pradesh | 2  | 0  |
| 33 | Soundari et al., 2020 <sup>29</sup>                | Tamil Nadu     | 43 | 2  |
| 34 | Mitra et al., 2020 <sup>30</sup>                   | Odisha         | 24 | 2  |
| 35 | Naha et al., 2020 <sup>61</sup>                    | West Bengal    | 1  | 0  |
| 36 | Das et al., 2020 <sup>31</sup>                     | West Bengal    | 31 | 0  |
| 37 | Pathak et al., 2020 <sup>62</sup>                  | Uttar Pradesh  | 1  | 1  |
| 38 | Bean et al., 2019 <sup>63</sup>                    | West Bengal    | 1  | 0  |
| 39 | Gogry et al., 2019 <sup>33</sup>                   | Delhi          | 47 | 5  |
| 40 | Shankar et al., 2019 <sup>64</sup>                 | Tamil Nadu     | 65 | 0  |
| 41 | Mathur et al., 2019 <sup>34</sup>                  | Delhi          | 34 | 0  |
| 42 | Paul et al., 2019 <sup>65</sup>                    | Kerala         | 1  | 0  |
| 43 | Sundaramoorthy et al., 2019b <sup>36</sup>         | Tamil Nadu     | 2  | 0  |
| 44 | Subramaniam & Muthukrishnan,<br>2019 <sup>66</sup> | Tamil Nadu     | 2  | 2  |
| 45 | Amladi et al., 2019 <sup>37</sup>                  | Tamil Nadu     | 14 | 0  |
| 46 | Rahman & Ahmad., 2019 <sup>67</sup>                | Uttar Pradesh  | 20 | 20 |
| 47 | Ghafur et al., 2019 <sup>68</sup>                  | Tamil Nadu     | 71 | 3  |
| 48 | Kumar et al., 2018 <sup>40</sup>                   | Kerala         | 17 | 0  |
| 49 | Shankar et al., 2018 <sup>69</sup>                 | Tamil Nadu     | 1  | 0  |
| 50 | Singh et al., 2018 <sup>70</sup>                   | Uttar Pradesh  | 21 | 4  |
| 51 | Aggarwal et al., 2018 <sup>71</sup>                | Delhi          | 7  | 0  |
| 52 | Mathur et al., 2018 <sup>72</sup>                  | Tamil Nadu     | 8  | 0  |
| 53 | Manohar et al., 2017 <sup>41</sup>                 | Tamil Nadu     | 29 | 0  |
| 54 | Pragasam et al., 2017 <sup>73</sup>                | Tamil Nadu     | 8  | 0  |
| 55 | Marathe et al., 2017 <sup>74</sup>                 | Maharashtra    | 1  | 1  |
| 56 | Veerarghavan et al., 2016 <sup>75</sup>            | Tamil Nadu     | 1  | 0  |
| 57 | Bernasconi et al., 2016 <sup>76</sup>              | -              | 5  | 1  |
| 58 | Kumar et al., 2016 A <sup>77</sup>                 | Haryana        | 1  | 1  |

# The paper was published in 2023 as an online early version, hence included in the study.

**Supplementary Table 3- PRISMA 2020 Checklist.**

| Section and Topic             | Item# | Checklist item                                                                                                                                                                                                                                                                                       | Location where item is reported |
|-------------------------------|-------|------------------------------------------------------------------------------------------------------------------------------------------------------------------------------------------------------------------------------------------------------------------------------------------------------|---------------------------------|
| <b>TITLE</b>                  |       |                                                                                                                                                                                                                                                                                                      |                                 |
| Title                         | 1     | Identify the report as a systematic review.                                                                                                                                                                                                                                                          | 1                               |
| <b>ABSTRACT</b>               |       |                                                                                                                                                                                                                                                                                                      |                                 |
| Abstract                      | 2     | See the PRISMA 2020 for Abstracts checklist.                                                                                                                                                                                                                                                         | 2                               |
| <b>INTRODUCTION</b>           |       |                                                                                                                                                                                                                                                                                                      |                                 |
| Rationale                     | 3     | Describe the rationale for the review in the context of existing knowledge.                                                                                                                                                                                                                          | 3-5                             |
| Objectives                    | 4     | Provide an explicit statement of the objective(s) or question(s) the review addresses.                                                                                                                                                                                                               | 5                               |
| <b>METHODS</b>                |       |                                                                                                                                                                                                                                                                                                      |                                 |
| Eligibility criteria          | 5     | Specify the inclusion and exclusion criteria for the review and how studies were grouped for the syntheses.                                                                                                                                                                                          | 5-6                             |
| Information sources           | 6     | Specify all databases, registers, websites, organisations, reference lists and other sources searched or consulted to identify studies. Specify the date when each source was last searched or consulted.                                                                                            | 5                               |
| Search strategy               | 7     | Present the full search strategies for all databases, registers and websites, including any filters and limits used.                                                                                                                                                                                 | 5                               |
| Selection process             | 8     | Specify the methods used to decide whether a study met the inclusion criteria of the review, including how many reviewers screened each record and each report retrieved, whether they worked independently, and if applicable, details of automation tools used in the process.                     | 5-6                             |
| Data collection process       | 9     | Specify the methods used to collect data from reports, including how many reviewers collected data from each report, whether they worked independently, any processes for obtaining or confirming data from study investigators, and if applicable, details of automation tools used in the process. | 6                               |
| Data items                    | 10a   | List and define all outcomes for which data were sought. Specify whether all results that were compatible with each outcome domain in each study were sought (e.g. for all measures, time points, analyses), and if not, the methods used to decide which results to collect.                        | 6                               |
|                               | 10b   | List and define all other variables for which data were sought (e.g. participant and intervention characteristics, funding sources). Describe any assumptions made about any missing or unclear information.                                                                                         | 6-7                             |
| Study risk of bias assessment | 11    | Specify the methods used to assess risk of bias in the included studies, including details of the tool(s) used, how many reviewers assessed each study and whether they worked independently, and if applicable, details of automation tools used in the process.                                    | 6                               |
| Effect measures               | 12    | Specify for each outcome the effect measure(s) (e.g. risk ratio, mean difference) used in the synthesis or presentation of results.                                                                                                                                                                  | 6                               |
| Synthesis methods             | 13a   | Describe the processes used to decide which studies were eligible for each synthesis (e.g. tabulating the study intervention                                                                                                                                                                         | N/A                             |

|                               |              |                                                                                                                                                                                                                                                                                      |                                        |
|-------------------------------|--------------|--------------------------------------------------------------------------------------------------------------------------------------------------------------------------------------------------------------------------------------------------------------------------------------|----------------------------------------|
|                               |              | characteristics and comparing against the planned groups for each synthesis (item #5)).                                                                                                                                                                                              |                                        |
|                               | 13b          | Describe any methods required to prepare the data for presentation or synthesis, such as handling of missing summary statistics, or data conversions.                                                                                                                                | 6                                      |
|                               | 13c          | Describe any methods used to tabulate or visually display results of individual studies and syntheses.                                                                                                                                                                               | 6                                      |
|                               | 13d          | Describe any methods used to synthesize results and provide a rationale for the choice(s). If meta-analysis was performed, describe the model(s), method(s) to identify the presence and extent of statistical heterogeneity, and software package(s) used.                          | 6-7                                    |
|                               | 13e          | Describe any methods used to explore possible causes of heterogeneity among study results (e.g. subgroup analysis, meta-regression).                                                                                                                                                 | 6-7                                    |
|                               | 13f          | Describe any sensitivity analyses conducted to assess robustness of the synthesized results.                                                                                                                                                                                         | 7                                      |
| Reporting bias assessment     | 14           | Describe any methods used to assess risk of bias due to missing results in a synthesis (arising from reporting biases).                                                                                                                                                              | 7                                      |
| Certainty assessment          | 15           | Describe any methods used to assess certainty (or confidence) in the body of evidence for an outcome.                                                                                                                                                                                | 7                                      |
| <b>Section and Topic</b>      | <b>Item#</b> | <b>Checklist item</b>                                                                                                                                                                                                                                                                | <b>Location where item is reported</b> |
| <b>RESULTS</b>                |              |                                                                                                                                                                                                                                                                                      |                                        |
| Study selection               | 16a          | Describe the results of the search and selection process, from the number of records identified in the search to the number of studies included in the review, ideally using a flow diagram.                                                                                         | 7                                      |
|                               | 16b          | Cite studies that might appear to meet the inclusion criteria, but which were excluded, and explain why they were excluded.                                                                                                                                                          | 7                                      |
| Study characteristics         | 17           | Cite each included study and present its characteristics.                                                                                                                                                                                                                            | Suppl. Info.                           |
| Risk of bias in studies       | 18           | Present assessments of risk of bias for each included study.                                                                                                                                                                                                                         | 7, Table-1                             |
| Results of individual studies | 19           | For all outcomes, present, for each study: (a) summary statistics for each group (where appropriate) and (b) an effect estimate and its precision (e.g. confidence/credible interval), ideally using structured tables or plots.                                                     | Fig. 1, Table-1                        |
| Results of syntheses          | 20a          | For each synthesis, briefly summarise the characteristics and risk of bias among contributing studies.                                                                                                                                                                               | Table-1, Suppl. Fig. 1 & 2             |
|                               | 20b          | Present results of all statistical syntheses conducted. If meta-analysis was done, present for each the summary estimate and its precision (e.g. confidence/credible interval) and measures of statistical heterogeneity. If comparing groups, describe the direction of the effect. | Table-1                                |
|                               | 20c          | Present results of all investigations of possible causes of heterogeneity among study results.                                                                                                                                                                                       | 8, Table-1                             |
|                               | 20d          | Present results of all sensitivity analyses conducted to assess the robustness of the synthesized results.                                                                                                                                                                           | 8, Suppl. Fig. 3 & 4                   |

|                                                |     |                                                                                                                                                                                                                                            |                    |
|------------------------------------------------|-----|--------------------------------------------------------------------------------------------------------------------------------------------------------------------------------------------------------------------------------------------|--------------------|
| Reporting biases                               | 21  | Present assessments of risk of bias due to missing results (arising from reporting biases) for each synthesis assessed.                                                                                                                    | ----               |
| Certainty of evidence                          | 22  | Present assessments of certainty (or confidence) in the body of evidence for each outcome assessed.                                                                                                                                        | ----               |
| <b>DISCUSSION</b>                              |     |                                                                                                                                                                                                                                            |                    |
| Discussion                                     | 23a | Provide a general interpretation of the results in the context of other evidence.                                                                                                                                                          | 8-10               |
|                                                | 23b | Discuss any limitations of the evidence included in the review.                                                                                                                                                                            | 10                 |
|                                                | 23c | Discuss any limitations of the review processes used.                                                                                                                                                                                      | 10                 |
|                                                | 23d | Discuss implications of the results for practice, policy, and future research.                                                                                                                                                             | 10                 |
| <b>OTHER INFORMATION</b>                       |     |                                                                                                                                                                                                                                            |                    |
| Registration and protocol                      | 24a | Provide registration information for the review, including register name and registration number, or state that the review was not registered.                                                                                             | N/A                |
|                                                | 24b | Indicate where the review protocol can be accessed, or state that a protocol was not prepared.                                                                                                                                             | 5-6                |
|                                                | 24c | Describe and explain any amendments to information provided at registration or in the protocol.                                                                                                                                            | ----               |
| Support                                        | 25  | Describe sources of financial or non-financial support for the review, and the role of the funders or sponsors in the review.                                                                                                              | 11                 |
| Competing interests                            | 26  | Declare any competing interests of review authors.                                                                                                                                                                                         | 11                 |
| Availability of data, code and other materials | 27  | Report which of the following are publicly available and where they can be found: template data collection forms; data extracted from included studies; data used for all analyses; analytic code; any other materials used in the review. | Suppl. Information |

From: Page MJ, McKenzie JE, Bossuyt PM, Boutron I, Hoffmann TC, Mulrow CD, et al. The PRISMA 2020 statement: an updated guideline for reporting systematic reviews. *BMJ* 2021;372:n71. doi: 10.1136/bmj.n71

For more information, visit: <http://www.prisma-statement.org/>



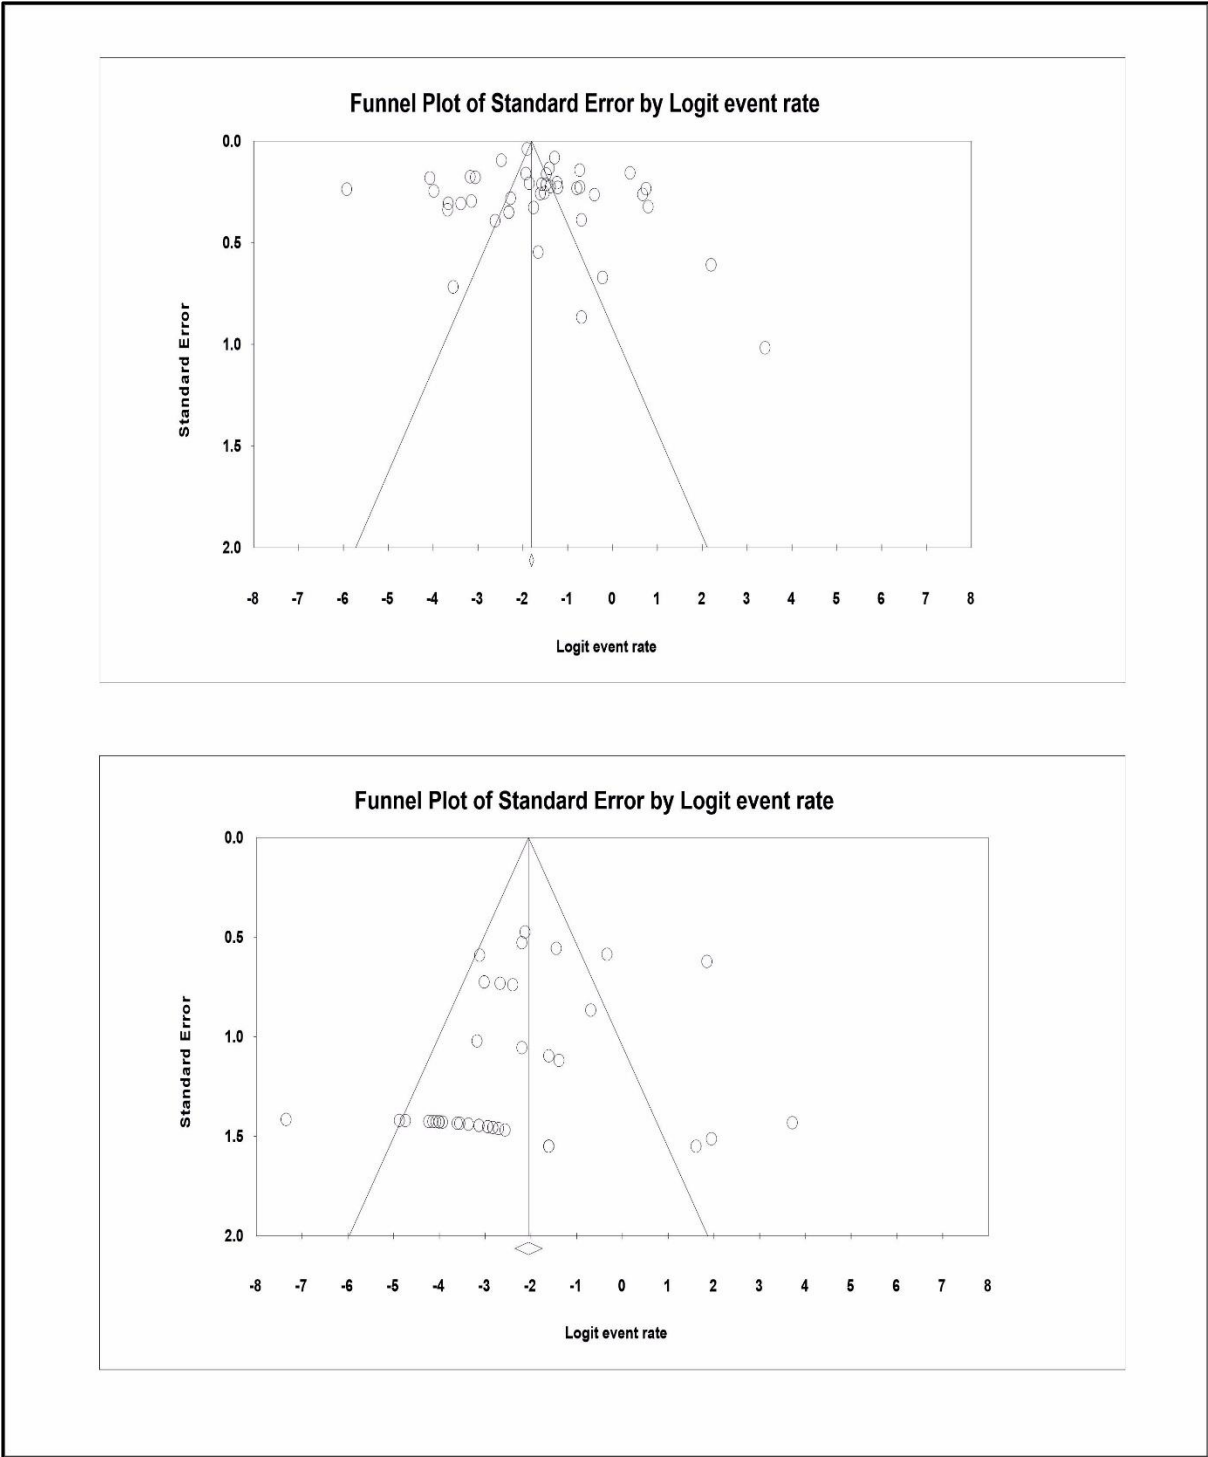

**Supplementary Figure 1.** Publication bias determination by Funnel plot of polymyxin resistant bacteria in India (A) and contribution of *mcr* gene in the development of polymyxin resistance (B).

**A. Delhi**

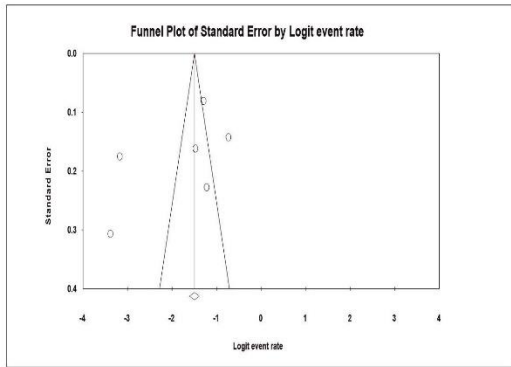

**B. Odisha**

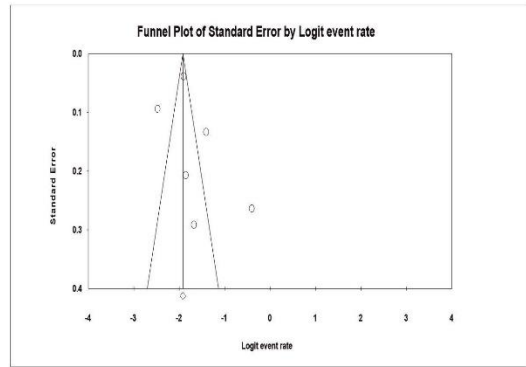

**C. Tamil Nadu**

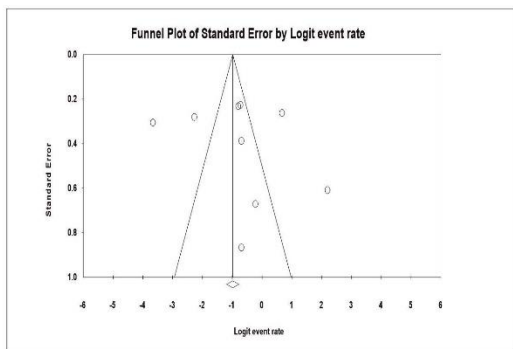

**D. Uttar Pradesh**

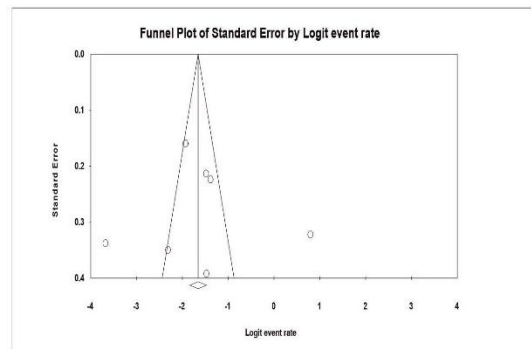

**E. West Bengal**

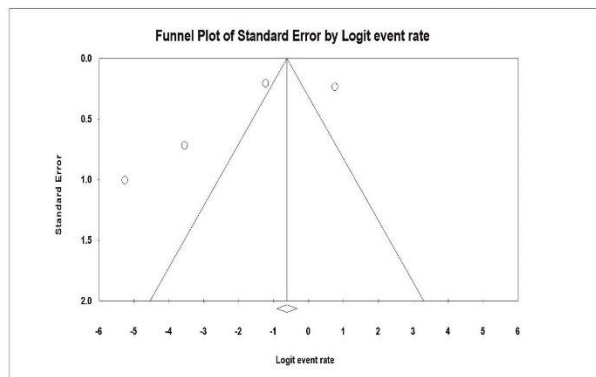

**Supplementary Figure 2.** Publication bias determination by Funnel plot of polymyxin-resistant bacteria in different states of India, (A) Delhi, (B) Odisha, (C) Tamil Nadu, (D) Uttar Pradesh, and (E) West Bengal.

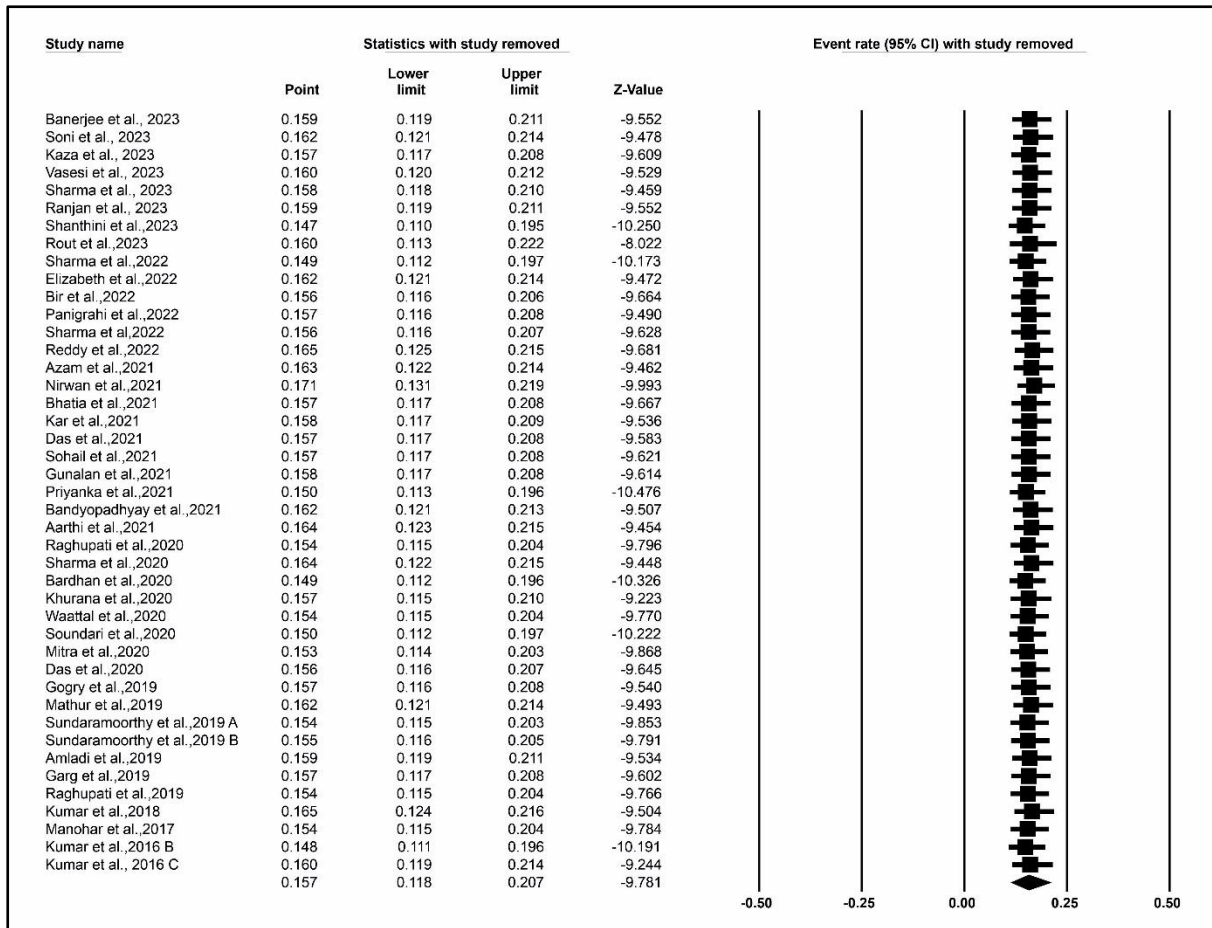

**Supplementary Figure 3.** Sensitivity plot demonstrating the incidence of polymyxin-resistant bacteria in India.

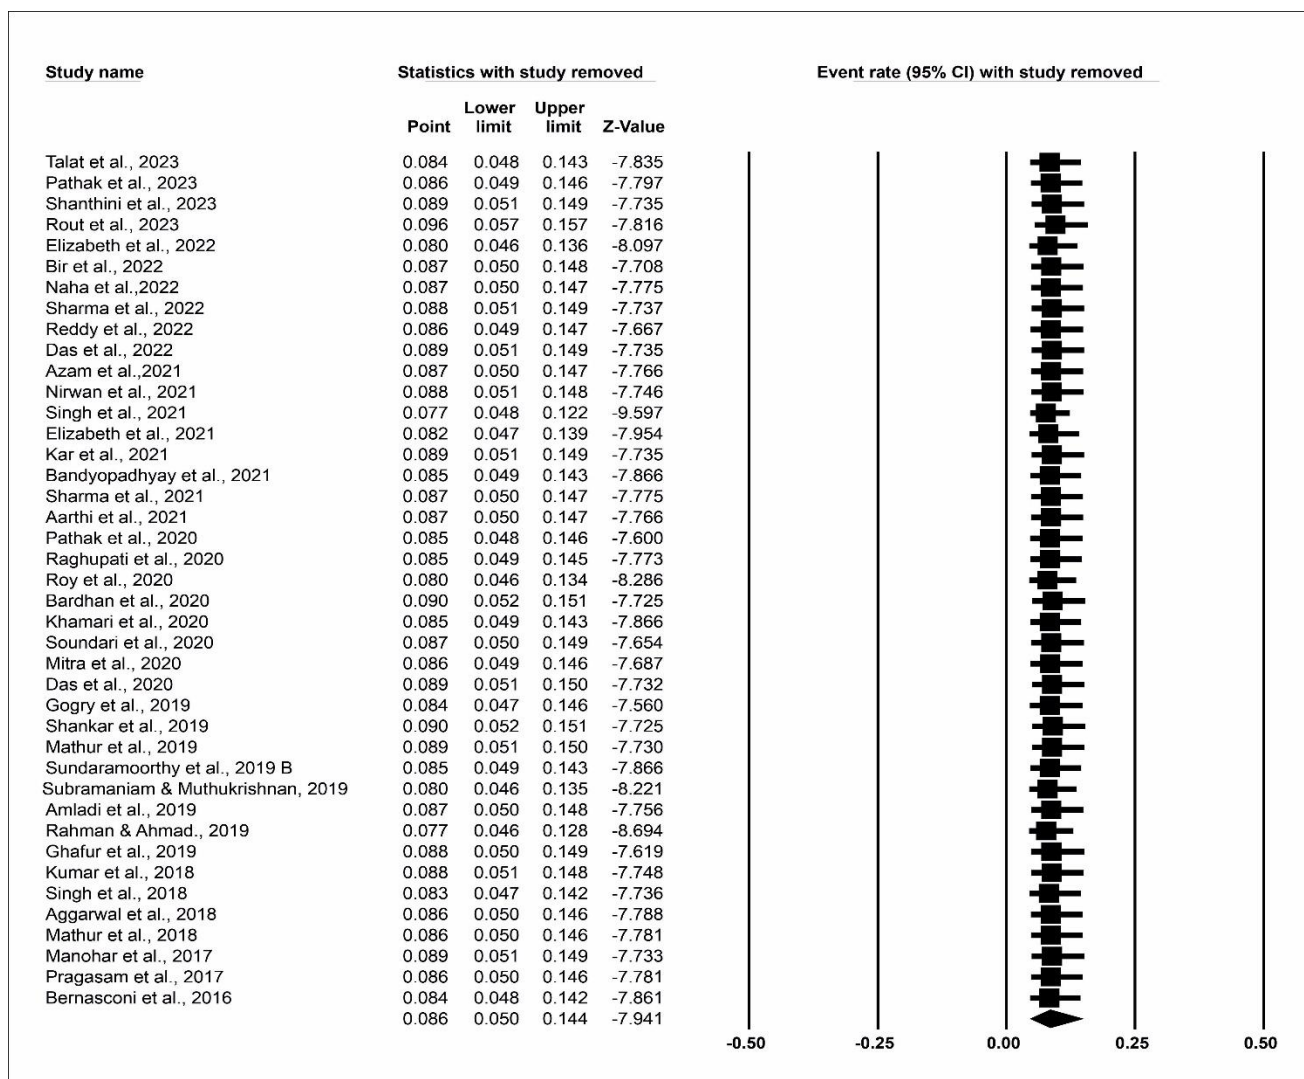

**Supplementary Figure 4.** Sensitivity plot demonstrating the contribution of the *mcr* gene in the development of polymyxin resistance in India.

## References

1. Banerjee T, Adwityama A, Sharma S, Mishra K, Prusti P, Maitra U. Comparative evaluation of colistin broth disc elution (CBDE) and broth microdilution (BMD) in clinical isolates of *Pseudomonas aeruginosa* with special reference to heteroresistance. *Indian J Med Microbiol* 2024; **47**: 100494.
2. Soni M, Kapoor G, Perumal N, Chaurasia D. Emergence of Multidrug-Resistant Non-Fermenting Gram-Negative Bacilli in a Tertiary Care Teaching Hospital of Central India: Is Colistin Resistance Still a Distant Threat? *Cureus* 2023. Available at: <https://www.cureus.com/articles/153479-emergence-of-multidrug-resistant-non-fermenting-gram-negative-bacilli-in-a-tertiary-care-teaching-hospital-of-central-india-is-colistin-resistance-still-a-distant-threat>. Accessed January 11, 2024.
3. Kaza P, Britto XB, Mahindroo J, *et al.* Extensively-drug resistant (XDR) *Klebsiella pneumoniae* associated with complicated urinary tract infection in Northern India. *Jpn J Infect Dis* 2023; JJID.2023.009.
4. Vasesi D, Gupta V, Gupta P, Singhal L. Risk factor and resistance profile of colistin resistant *Acinetobacter baumannii* and *Klebsiella pneumoniae*. *Indian J Med Microbiol* 2024; **47**: 100486.
5. Sharma S, Banerjee T, Yadav G, Kumar A. Susceptibility profile of blaOXA-23 and metallo- $\beta$ -lactamases co-harboring isolates of carbapenem resistant *Acinetobacter baumannii* (CRAB) against standard drugs and combinations. *Front Cell Infect Microbiol* 2023; **12**: 1068840.
6. Ranjan R, Iyer RN, Jangam RR, Arora N. Evaluation of in-vitro colistin susceptibility and clinical profile of carbapenem resistant Enterobacteriaceae related invasive infections. *Indian J Med Microbiol* 2023; **41**: 40–4.
7. Shanthini T, Manohar P, Hua X, Leptihn S, Nachimuthu R. *Detection of Hypervirulent Klebsiella pneumoniae from Clinical Samples in Tamil Nadu*. Infectious Diseases (except HIV/AIDS); 2023. Available at: <http://medrxiv.org/lookup/doi/10.1101/2023.02.19.23286158>. Accessed August 17, 2023.
8. Rout B, Dash SK, Sahu KK, Behera B, Praharaj I, Otta S. *Evaluation of different methods for in vitro susceptibility testing of colistin in carbapenem resistant Gram negative bacilli*. 2023. Available at: <https://www.microbiologyresearch.org/content/journal/acmi/10.1099/acmi.0.000595.v1>. Accessed August 17, 2023.
9. Sharma S, Banerjee T, Kumar A, Yadav G, Basu S. Extensive outbreak of colistin resistant, carbapenemase (blaOXA-48, blaNDM) producing *Klebsiella pneumoniae* in a large tertiary care hospital, India. *Antimicrob Resist Infect Control* 2022; **11**: 1.
10. Elizabeth R, Baishya S, Kalita B, *et al.* Colistin exposure enhances expression of eptB in colistin-resistant *Escherichia coli* co-harboring mcr-1. *Sci Rep* 2022; **12**: 1348.
11. Bir R, Gautam H, Arif N, *et al.* Analysis of colistin resistance in carbapenem-resistant *Enterobacteriales* and XDR *Klebsiella pneumoniae*. *Ther Adv Infect Dis* 2022; **9**: 204993612210806.
12. Panigrahi K, Pathi BK, Poddar N, *et al.* Colistin Resistance Among Multi-Drug Resistant Gram-Negative Bacterial Isolates From Different Clinical Samples of ICU Patients: Prevalence and Clinical Outcomes. *Cureus* 2022. Available at: <https://www.cureus.com/articles/97516-colistin-resistance-among-multi-drug-resistant-gram-negative-bacterial-isolates-from->

different-clinical-samples-of-icu-patients-prevalence-and-clinical-outcomes. Accessed August 17, 2023.

13. Sharma S, Banerjee T, Garg R, Das P. Evaluation Report of the Colistin Broth Disk Elution Method with *Acinetobacter baumannii* Isolates from a Low-Resource Setting Carvalho-Assef APD, ed. *Microbiol Spectr* 2022; **10**: e00871-22.
14. Reddy BRC, Geetha RV, Singh M, Rani RU, Nekkanti KN. Mcr-1 expression in progression of colistin resistance gram negative bacilli of clinical specimens derived from Intensive Care Units, wards and hospital setting of Deccan Eco Region of Southern India. *J Pharm Negat Results* 2022; **13**.
15. Das A, Sahoo RK, Gaur M, *et al.* Molecular prevalence of resistance determinants, virulence factors and capsular serotypes among colistin resistance carbapenemase producing *Klebsiella pneumoniae*: a multi-centric retrospective study. *3 Biotech* 2022; **12**: 30.
16. Nirwan PK, Chatterjee N, Panwar R, Dudeja M, Jaggi N. Mutations in two component system (PhoPQ and PmrAB) in colistin resistant *Klebsiella pneumoniae* from North Indian tertiary care hospital. *J Antibiot (Tokyo)* 2021; **74**: 450–7.
17. Azam M, Gaiind R, Yadav G, *et al.* Colistin Resistance Among Multiple Sequence Types of *Klebsiella pneumoniae* Is Associated With Diverse Resistance Mechanisms: A Report From India. *Front Microbiol* 2021; **12**: 609840.
18. Kar P, Behera B, Mohanty S, Jena J, Mahapatra A. Detection of Colistin Resistance in Carbapenem Resistant Enterobacteriaceae by Reference Broth Microdilution and Comparative Evaluation of Three Other Methods. *J Lab Physicians* 2021; **13**: 263–9.
19. Mathur P, Singh P, Singh GP, Prasad C, Singh PK, Bindra A. Healthcare-associated Infections in Pediatric Patients in Neurotrauma Intensive Care Unit: A Retrospective Analysis. *Indian J Crit Care Med* 2021; **25**: 1308–13.
20. Sohail MN, Rathnamma D, Priya SC, *et al.* Salmonella from Farm to Table: Isolation, Characterization, and Antimicrobial Resistance of Salmonella from Commercial Broiler Supply Chain and Its Environment Cantore S, ed. *BioMed Res Int* 2021; **2021**: 1–12.
21. Gunalan A, Sarumathi D, Sastry AS, Ramanathan V, Rajaa S, Sistla S. Effect of combined colistin and meropenem against meropenem resistant *Acinetobacter baumannii* and *Pseudomonas aeruginosa* by checkerboard method: A cross sectional analytical study.
22. Priyanka, Meena PR, Meghwanshi KK, Rana A, Singh AP. Leafy greens as a potential source of multidrug-resistant diarrhoeagenic *Escherichia coli* and *Salmonella*. *Microbiology* 2021; **167**. Available at: <https://www.microbiologyresearch.org/content/journal/micro/10.1099/mic.0.001059>. Accessed August 17, 2023.
23. Bandyopadhyay S, Bhattacharyya D, Samanta I, *et al.* Characterization of Multidrug-Resistant Biofilm-Producing *Escherichia coli* and *Klebsiella pneumoniae* in Healthy Cattle and Cattle with Diarrhea. *Microb Drug Resist* 2021; **27**: 1457–69.
24. Sharma S, Banerjee T, Yadav G, Palandurkar K. Mutations at Novel Sites in *pmrA/B* and *lpxA/D* Genes and Absence of Reduced Fitness in Colistin-Resistant *Acinetobacter baumannii* from a Tertiary Care Hospital, India. *Microb Drug Resist* 2021; **27**: 628–36.
25. Aarthi M, Subramanian S, Krishnan P. Colistin resistance among multidrug resistant gram negative bacteria isolated from cancer patients from Chennai, South India. *Int J Infect Dis* 2020; **101**: 39.

26. Ragupathi NKD, Sethuvel DPM, Anandan S, *et al.* First hybrid complete genome of *Aeromonas veronii* reveals chromosome-mediated novel structural variant mcr-3.30 from a human clinical sample. *Access Microbiol* 2020; **2**. Available at: <https://www.microbiologyresearch.org/content/journal/acmi/10.1099/acmi.0.000103>. Accessed August 17, 2023.
27. Bardhan T, Chakraborty M, Bhattacharjee B. Prevalence of Colistin-Resistant, Carbapenem-Hydrolyzing Proteobacteria in Hospital Water Bodies and Out-Falls of West Bengal, India. *Int J Environ Res Public Health* 2020; **17**: 1007.
28. Khurana S, Malhotra R, Mathur P. Evaluation of Vitek®2 performance for colistin susceptibility testing for Gram-negative isolates. *JAC-Antimicrob Resist* 2020; **2**: dlaa101.
29. Palani GS, Ghafur A, Krishnan P, Rayvathy B, Thirunarayan M. Intestinal carriage of colistin resistant Enterobacteriaceae in hospitalized patients from an Indian center. *Diagn Microbiol Infect Dis* 2020; **97**: 114998.
30. Mitra S, Basu S, Rath S, Sahu SK. Colistin resistance in Gram-negative ocular infections: prevalence, clinical outcome and antibiotic susceptibility patterns. *Int Ophthalmol* 2020; **40**: 1307–17.
31. Das S, Roy S, Roy S, *et al.* Colistin Susceptibility Testing of Gram-Negative Bacilli: Better Performance of Vitek2 System than E-Test Compared to Broth Microdilution Method as the Gold Standard Test. *Indian J Med Microbiol* 2020; **38**: 58–65.
32. Wattal C, Goel N, Oberoi JK, Datta S, Raveendran R. Performance of Three Commercial Assays for Colistin Susceptibility in Clinical Isolates and Mcr-1 Carrying Reference Strain. *Indian J Med Microbiol* 2019; **37**: 488–95.
33. Gogry FA, Siddiqui MT, Haq. QMohdR. Emergence of mcr-1 conferred colistin resistance among bacterial isolates from urban sewage water in India. *Environ Sci Pollut Res* 2019; **26**: 33715–7.
34. Mathur P, Khurana S, De Man TJB, *et al.* Multiple importations and transmission of colistin-resistant *Klebsiella pneumoniae* in a hospital in northern India. *Infect Control Hosp Epidemiol* 2019; **40**: 1387–93.
35. Sundaramoorthy NS, Mohan HM, Subramaniam S, *et al.* Ursolic acid inhibits colistin efflux and curtails colistin resistant Enterobacteriaceae. *AMB Express* 2019; **9**: 27.
36. Sundaramoorthy NS, Suresh P, Selva Ganesan S, GaneshPrasad A, Nagarajan S. Restoring colistin sensitivity in colistin-resistant *E. coli*: Combinatorial use of MarR inhibitor with efflux pump inhibitor. *Sci Rep* 2019; **9**: 19845.
37. Amladi A, Abirami B, Devi Sm, *et al.* Susceptibility profile, resistance mechanisms & efficacy ratios of fosfomycin, nitrofurantoin & colistin for carbapenem-resistant Enterobacteriaceae causing urinary tract infections. *Indian J Med Res* 2019; **149**: 185.
38. Garg A, Garg J, Kumar S, Bhattacharya A, Agarwal S, Upadhyay G. Molecular epidemiology & therapeutic options of carbapenem-resistant Gram-negative bacteria. *Indian J Med Res* 2019; **149**: 285.
39. Ragupathi ND, Bakthavatchalam Y, Mathur P, *et al.* Plasmid profiles among some ESKAPE pathogens in a tertiary care centre in south India. *Indian J Med Res* 2019; **149**: 222.
40. Kumar A, Biswas L, Omgy N, *et al.* Colistin resistance due to insertional inactivation of the mgrB in *Klebsiella pneumoniae* of clinical origin: First report from India: Resistencia a

colistina debido a inactivación insercional del gen *mgrB* en aislados clínicos de *Klebsiella pneumoniae*: Primera notificación en India. *Rev Esp Quimioter* 2018; **31**: 406.

41. Manohar P, Shanthini T, Ayyanar R, *et al.* The distribution of carbapenem- and colistin-resistance in Gram-negative bacteria from the Tamil Nadu region in India. *J Med Microbiol* 2017; **66**: 874–83.

42. Kumar M. Colistin and Tigecycline Resistance in Carbapenem-Resistant Enterobacteriaceae: Checkmate to Our Last Line Of Defense. *Infect Control Hosp Epidemiol* 2016; **37**: 624–5.

43. Kumar M, Gupta A, Sahoo RK, Jena J, Debata NK, Subudhi E. Functional Genome Screening to Elucidate the Colistin Resistance Mechanism. *Sci Rep* 2016; **6**: 23156.

44. Seethalakshmi PS, Ru VPN, Prabhakaran A, *et al.* Genomic investigation unveils high-risk ESBL producing Enterobacteriaceae within a rural environmental water body. *Curr Res Microb Sci* 2024; **6**: 100216.

45. Naha S, Basak P, Sands K, *et al.* Carriage and within-host diversity of *mcr-1.1*-harbouring *Escherichia coli* from pregnant mothers: inter- and intra-mother transmission dynamics of *mcr-1.1*. *Emerg Microbes Infect* 2023; **12**: 2278899.

46. Premnath MAC, Prabakaran K, Sivasankar S, Boppe A, Sriramajayam L, Jeyaraj S. Occurrence of *mcr* genes and alterations in *mgrB* gene in intrinsic colistin-resistant Enterobacteriales isolated from chicken meat samples. *Int J Food Microbiol* 2023; **404**: 110323.

47. Talat A, Blake KS, Dantas G, Khan AU. Metagenomic Insight into Microbiome and Antibiotic Resistance Genes of High Clinical Concern in Urban and Rural Hospital Wastewater of Northern India Origin: a Major Reservoir of Antimicrobial Resistance Liu J, ed. *Microbiol Spectr* 2023; **11**: e04102-22.

48. Pathak A, Tejan N, Dubey A, *et al.* Outbreak of colistin resistant, carbapenemase (*bla*NDM, *bla*OXA-232) producing *Klebsiella pneumoniae* causing blood stream infection among neonates at a tertiary care hospital in India. *Front Cell Infect Microbiol* 2023; **13**: 1051020.

49. Aldeia C, Campos-Madueno EI, Sendi P, Endimiani A. Complete Genome Sequence of the First Colistin-Resistant *Raoultella electrica* Strain Dunning Hotopp JC, ed. *Microbiol Resour Announc* 2023; **12**: e00047-23.

50. S S, Premnath M, Pr P, *et al.* Predicting human risk with multidrug resistant *Enterobacter hormaechei* MS2 with MCR 9 gene isolated from the feces of healthy broiler through whole genome sequence based analysis. In Review; 2023. Available at: <https://www.researchsquare.com/article/rs-2710811/v1>. Accessed August 17, 2023.

51. Talat A, Usmani A, Khan AU. Detection of *E. coli* IncX1 Plasmid-Mediated *mcr-5.1* Gene in an Indian Hospital Sewage Water Using Shotgun Metagenomic Sequencing: A First Report. *Microb Drug Resist* 2022; **28**: 759–64.

52. Naha S, Sands K, Mukherjee S, Dutta S, Basu S. A 12 year experience of colistin resistance in *Klebsiella pneumoniae* causing neonatal sepsis: two-component systems, efflux pumps, lipopolysaccharide modification and comparative phylogenomics. *J Antimicrob Chemother* 2022; **77**: 1586–91.

53. Singh S, Pathak A, Rahman M, *et al.* Genetic Characterisation of Colistin Resistant *Klebsiella pneumoniae* Clinical Isolates From North India. *Front Cell Infect Microbiol* 2021; **11**: 666030.



54. Elizabeth R, Wangkheimayum J, Singha KM, Chanda DD, Bhattacharjee A. Subinhibitory concentration stress of colistin enhanced PhoPQ expression in *Escherichia coli* harboring *mcr-1*. *J Basic Microbiol* 2021; **61**: 1029–34.
55. Karade S, Sen S, Shergill SPS, Jani K, Shouche Y, Gupta RM. Whole genome sequence of colistin-resistant *Escherichia coli* from western India. *Med J Armed Forces India* 2021; **77**: 297–301.
56. Pathak A, Singh S, Kumar A, Prasad KN. Emergence of chromosome borne colistin resistance gene, *mcr-1* in clinical isolates of *Pseudomonas aeruginosa*. *Int J Infect Dis* 2020; **101**: 22.
57. Roy S, Das P, Das S, *et al.* Detection of the emergence of *mcr-1* –mediated colistin-resistant *Escherichia coli* and *Klebsiella pneumoniae* through a hospital-based surveillance in an oncology center in eastern India. *Infect Control Hosp Epidemiol* 2020; **41**: 378–80.
58. Dey S, Gaur M, Sahoo RK, *et al.* Genomic characterization of XDR *Klebsiella pneumoniae* ST147 co-resistant to carbapenem and colistin – The first report in India. *J Glob Antimicrob Resist* 2020; **22**: 54–6.
59. Sahoo RK, Das A, Sahoo S, Gaur M, Rao EV, Subudhi E. The first report of colistin–carbapenem resistance in *Klebsiella pneumoniae* ST70 isolated from the pediatric unit in India. *Braz J Microbiol* 2020; **51**: 1–3.
60. Khamari B, Lama M, Pachi Pulusu C, *et al.* Molecular Analyses of Biofilm-Producing Clinical *Acinetobacter baumannii* Isolates from a South Indian Tertiary Care Hospital. *Med Princ Pract* 2020; **29**: 580–7.
61. Naha S, Sands K, Mukherjee S, *et al.* KPC-2-producing *Klebsiella pneumoniae* ST147 in a neonatal unit: Clonal isolates with differences in colistin susceptibility attributed to AcrAB-TolC pump. *Int J Antimicrob Agents* 2020; **55**: 105903.
62. Pathak A, Singh S, Prasad N, Prasad KN. SAT-423 EMERGENCE OF bla<sub>NDM</sub> AND *mcr-1* POSITIVE PAN- AND EXTREMELY- DRUG RESISTANT BACTERIAL INFECTIONS IN PATIENTS WITH RENAL DISEASES. *Kidney Int Rep* 2020; **5**: S176–7.
63. Bean DC, Agarwal A, Cherian BP, Wareham DW. Hypermucoviscous polymyxin-resistant *Klebsiella pneumoniae* from Kolkata, India: Genomic and phenotypic analysis. *J Glob Antimicrob Resist* 2019; **17**: 1–2.
64. Shankar C, Venkatesan M, Rajan R, *et al.* Molecular characterization of colistin-resistant *Klebsiella pneumoniae* & its clonal relationship among Indian isolates. *Indian J Med Res* 2019; **149**: 199.
65. Paul M, Narendrakumar L, R. Vasanthakumary A, Joseph I, Thomas S. Genome sequence of a multidrug-resistant *Klebsiella pneumoniae* ST78 with high colistin resistance isolated from a patient in India. *J Glob Antimicrob Resist* 2019; **17**: 187–8.
66. Subramaniam N, Muthukrishnan A. Oral mucositis and microbial colonization in oral cancer patients undergoing radiotherapy and chemotherapy: A prospective analysis in a tertiary care dental hospital. *J Investig Clin Dent* 2019; **10**. Available at: <https://onlinelibrary.wiley.com/doi/10.1111/jicd.12454>. Accessed August 17, 2023.
67. RAHMAN M, Ahmad S. 549. First Report for Emergence of Chromosomal Borne Colistin Resistance Gene *mcr-1* in a Clinical *Acinetobacter Baumannii* Isolates from India. *Open Forum Infect Dis* 2019; **6**: S261–2.

68. Ghafur A, Shankar C, GnanaSoundari P, *et al.* Detection of chromosomal and plasmid-mediated mechanisms of colistin resistance in *Escherichia coli* and *Klebsiella pneumoniae* from Indian food samples. *J Glob Antimicrob Resist* 2019; **16**: 48–52.
69. Shankar C, Karunasree S, Manesh A, Veeraraghavan B. First Report of Whole-Genome Sequence of Colistin-Resistant *Klebsiella quasipneumoniae* subsp. *similipneumoniae* Producing KPC-9 in India. *Microb Drug Resist* 2019; **25**: 489–93.
70. Singh S, Pathak A, Kumar A, *et al.* Emergence of Chromosome-Borne Colistin Resistance Gene *mcr-1* in Clinical Isolates of *Klebsiella pneumoniae* from India. *Antimicrob Agents Chemother* 2018; **62**: e01885-17.
71. Aggarwal R, Rastogi N, Mathur P, *et al.* Colistin-resistant *Klebsiella pneumoniae* in Surgical Polytrauma Intensive Care Unit of Level-1 Trauma Center: First Case Series from Trauma Patients in India. *Indian J Crit Care Med Peer-Rev Off Publ Indian Soc Crit Care Med* 2018; **22**: 103.
72. Mathur P, Veeraraghavan B, Devanga Ragupathi NK, *et al.* Multiple mutations in lipid-A modification pathway & novel *fosA* variants in colistin-resistant *Klebsiella pneumoniae*. *Future Sci OA* 2018; **4**: FSO319.
73. Pragasam AK, Shankar C, Veeraraghavan B, *et al.* Molecular Mechanisms of Colistin Resistance in *Klebsiella pneumoniae* Causing Bacteremia from India—A First Report. *Front Microbiol* 2017; **7**. Available at: <http://journal.frontiersin.org/article/10.3389/fmicb.2016.02135/full>. Accessed August 17, 2023.
74. Marathe NP, Pal C, Gaikwad SS, Jonsson V, Kristiansson E, Larsson DGJ. Untreated urban waste contaminates Indian river sediments with resistance genes to last resort antibiotics. *Water Res* 2017; **124**: 388–97.
75. Veeraraghavan B, Anandan S, Ragupathi NKD, Vijayakumar S, Sethuvel DPM, Biswas I. Draft Genome Sequence of Colistin-Resistant *Acinetobacter baumannii* Strain VB22595 Isolated from a Central Line-Associated Bloodstream Infection. *Genome Announc* 2016; **4**: e00835-16.
76. Bernasconi OJ, Kuenzli E, Pires J, *et al.* Travelers Can Import Colistin-Resistant Enterobacteriaceae, Including Those Possessing the Plasmid-Mediated *mcr-1* Gene. *Antimicrob Agents Chemother* 2016; **60**: 5080–4.
77. Kumar M, Saha S, Subudhi E. More Furious Than Ever: *Escherichia coli* -Acquired Co-resistance Toward Colistin and Carbapenems. *Clin Infect Dis* 2016: ciw508.
